# Supplementary material
Source: MDPI journal article supplement (https://www.mdpi.com/2624-8549/5/3/132)
Supplement: s1 [file s1]

Article

# Encapsulation of Ciprofloxacin into Cyclodextrin Polymer Matrix: The Complex Formation with Human Serum Albumin and *In Vitro* Studies

Tatiana Yu. Kopnova, Anna A. Skuredina, Natalya G. Belogurova, Elena V. Kudryashova

## Supplementary

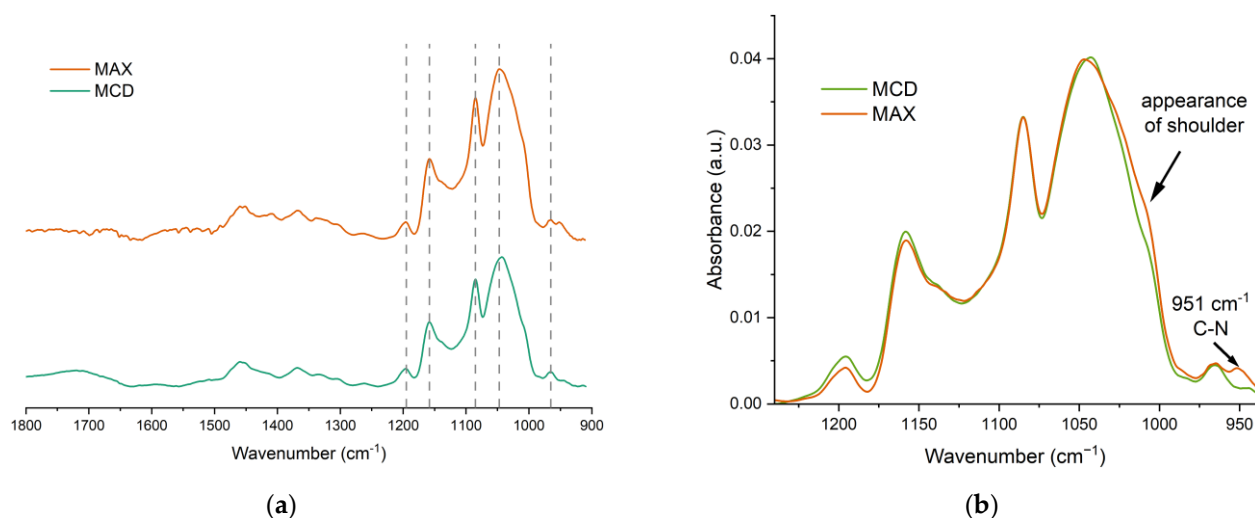

**Figure S1.** (a) Normalized FTIR spectra of MCD (green) and MAX (orange) pH 7.4, 22 °C. (b) Normalized FTIR spectra of MCD (green) and MAX (orange) range 1240 – 900 cm<sup>-1</sup> in details pH 7.4, 22 °C.
